# Supplementary material for: Metagenomic evidence for antibiotic-associated actinomycetes in the Karamay Gobi region
Source: Front Microbiol. 2024 Mar 5;15:1330880. doi: 10.3389/fmicb.2024.1330880 (PMC10949947; doi:10.3389/fmicb.2024.1330880)
Supplement: Supplementary file 1 [file Table_1.XLS]

## Sheet: Sheet1
Sample	Chao1	Goods_coverage	Simpson	Pielou_e	Shannon	Observed_species	ACE	Group
gbnb1	28909.8	0.999325	0.975158	0.559566	5.69057	26098	28810.6	gbnb
gbnb2	28566.4	0.999326	0.975237	0.559021	5.67824	25783	28514.3	gbnb
gbnb3	28917.1	0.999313	0.97555	0.561045	5.70242	25950	28737.4	gbnb
gbnb4	28566.4	0.999346	0.97489	0.559688	5.68489	25777	28357.5	gbnb
gbnb5	28675.5	0.999336	0.975359	0.559711	5.68785	25903	28519.1	gbnb
gbwb1	28668.3	0.999347	0.981203	0.582855	5.92327	25913	28504.1	gbwb
gbwb2	28553.5	0.999361	0.981024	0.582966	5.9261	25989	28473.5	gbwb
gbwb3	28625.5	0.999356	0.980615	0.582336	5.92131	26061	28590.5	gbwb
gbwb4	28575.7	0.999372	0.980922	0.583939	5.937	26034	28462.7	gbwb
gbwb5	28869.2	0.999343	0.981361	0.582925	5.9273	26061	28673.5	gbwb
gbzx1	24066.4	0.999477	0.9739	0.546867	5.4694	22056	24020.6	gbzx
gbzx2	24578.4	0.999444	0.97397	0.546217	5.46979	22336	24478.1	gbzx
gbzx3	25366.6	0.999393	0.974192	0.546479	5.48087	22684	25143.2	gbzx
gbzx4	25040.9	0.999407	0.974336	0.547072	5.48328	22538	24908.1	gbzx
gbzx5	24870.4	0.999424	0.974056	0.546099	5.47229	22487	24761.6	gbzx
