# Supplementary material for: Metagenomic evidence for antibiotic-associated actinomycetes in the Karamay Gobi region
Source: Front Microbiol. 2024 Mar 5;15:1330880. doi: 10.3389/fmicb.2024.1330880 (PMC10949947; doi:10.3389/fmicb.2024.1330880)
Supplement: Supplementary file 2 [file Table_2.XLS]

## Sheet: Sheet1
Taxon	Microphyla level	taxonomy
s_SCSIO-52915 sp902806075	bacterial	d_Bacteria;p_Actinobacteriota;c_Rubrobacteria;o_Rubrobacterales;f_Rubrobacteraceae;g_SCSIO-52915;s_SCSIO-52915 sp902806075
s_CADDYV01 sp902810695	bacterial	d_Bacteria;p_Actinobacteriota;c_Rubrobacteria;o_Rubrobacterales;f_Rubrobacteraceae;g_CADDYV01;s_CADDYV01 sp902810695
s_SCSIO-52909 sp902806015	bacterial	d_Bacteria;p_Actinobacteriota;c_Rubrobacteria;o_Rubrobacterales;f_Rubrobacteraceae;g_SCSIO-52909;s_SCSIO-52909 sp902806015
s_JACDGB01 sp013812245	bacterial	d_Bacteria;p_Actinobacteriota;c_Rubrobacteria;o_Rubrobacterales;f_Rubrobacteraceae;g_JACDGB01;s_JACDGB01 sp013812245
s_JACCUC01 sp013812485	bacterial	d_Bacteria;p_Actinobacteriota;c_Thermoleophilia;o_Solirubrobacterales;f_Thermoleophilaceae;g_JACCUC01;s_JACCUC01 sp013812485
s_SCSIO-52915 sp016781705	bacterial	d_Bacteria;p_Actinobacteriota;c_Rubrobacteria;o_Rubrobacterales;f_Rubrobacteraceae;g_SCSIO-52915;s_SCSIO-52915 sp016781705
s_WHTG01 sp009377835	bacterial	d_Bacteria;p_Actinobacteriota;c_Actinomycetia;o_Euzebyales;f_Egibacteraceae;g_WHTG01;s_WHTG01 sp009377835
s_SCSIO-52909 sp902805975	bacterial	d_Bacteria;p_Actinobacteriota;c_Rubrobacteria;o_Rubrobacterales;f_Rubrobacteraceae;g_SCSIO-52909;s_SCSIO-52909 sp902805975
s_SCSIO-52909 sp902806085	bacterial	d_Bacteria;p_Actinobacteriota;c_Rubrobacteria;o_Rubrobacterales;f_Rubrobacteraceae;g_SCSIO-52909;s_SCSIO-52909 sp902806085
s_SCSIO-52915 sp016781885	bacterial	d_Bacteria;p_Actinobacteriota;c_Rubrobacteria;o_Rubrobacterales;f_Rubrobacteraceae;g_SCSIO-52915;s_SCSIO-52915 sp016781885
s_WHSW01 sp009379895	bacterial	d_Bacteria;p_Actinobacteriota;c_Thermoleophilia;o_Solirubrobacterales;f_70-9;g_WHSW01;s_WHSW01 sp009379895
s_SCSIO-52909 sp011492945	bacterial	d_Bacteria;p_Actinobacteriota;c_Rubrobacteria;o_Rubrobacterales;f_Rubrobacteraceae;g_SCSIO-52909;s_SCSIO-52909 sp011492945
s_JACVSB01 sp014534155	bacterial	d_Bacteria;p_Actinobacteriota;c_Thermoleophilia;o_Gaiellales;f_Gaiellaceae;g_JACVSB01;s_JACVSB01 sp014534155
s_JACVRW01 sp013813135	bacterial	d_Bacteria;p_Actinobacteriota;c_Thermoleophilia;o_Solirubrobacterales;f_Thermoleophilaceae;g_JACVRW01;s_JACVRW01 sp013813135
s_JACCYG01 sp013696595	bacterial	d_Bacteria;p_Actinobacteriota;c_Thermoleophilia;o_Gaiellales;f_Gaiellaceae;g_JACCYG01;s_JACCYG01 sp013696595
s_SIRX01 sp004563715	bacterial	d_Bacteria;p_Actinobacteriota;c_Rubrobacteria;o_Rubrobacterales;f_Rubrobacteraceae;g_SIRX01;s_SIRX01 sp004563715
s_SCSIO-52915 sp902806055	bacterial	d_Bacteria;p_Actinobacteriota;c_Rubrobacteria;o_Rubrobacterales;f_Rubrobacteraceae;g_SCSIO-52915;s_SCSIO-52915 sp902806055
s_JACDBZ01 sp013820865	bacterial	d_Bacteria;p_Chloroflexota;c_Limnocylindria;o_QHBO01;f_QHBO01;g_JACDBZ01;s_JACDBZ01 sp013820865
s_SCSIO-52909 sp902805985	bacterial	d_Bacteria;p_Actinobacteriota;c_Rubrobacteria;o_Rubrobacterales;f_Rubrobacteraceae;g_SCSIO-52909;s_SCSIO-52909 sp902805985
s_JACDBZ01 sp013697395	bacterial	d_Bacteria;p_Chloroflexota;c_Limnocylindria;o_QHBO01;f_QHBO01;g_JACDBZ01;s_JACDBZ01 sp013697395
s_JACVSB01 sp013697275	bacterial	d_Bacteria;p_Actinobacteriota;c_Thermoleophilia;o_Gaiellales;f_Gaiellaceae;g_JACVSB01;s_JACVSB01 sp013697275
s_SCSIO-52915 sp902806065	bacterial	d_Bacteria;p_Actinobacteriota;c_Rubrobacteria;o_Rubrobacterales;f_Rubrobacteraceae;g_SCSIO-52915;s_SCSIO-52915 sp902806065
s_SCSIO-52909 sp902806095	bacterial	d_Bacteria;p_Actinobacteriota;c_Rubrobacteria;o_Rubrobacterales;f_Rubrobacteraceae;g_SCSIO-52909;s_SCSIO-52909 sp902806095
s_JACCUC01 sp902806245	bacterial	d_Bacteria;p_Actinobacteriota;c_Thermoleophilia;o_Solirubrobacterales;f_Thermoleophilaceae;g_JACCUC01;s_JACCUC01 sp902806245
s_JADDRA01 sp016781105	bacterial	d_Bacteria;p_Actinobacteriota;c_Acidimicrobiia;o_Acidimicrobiales;f_CADCSY01;g_JADDRA01;s_JADDRA01 sp016781105
s_LC5-5 sp016781135	bacterial	d_Bacteria;p_Actinobacteriota;c_Acidimicrobiia;o_Acidimicrobiales;f_CADCSY01;g_LC5-5;s_LC5-5 sp016781135
s_SCSIO-52909 sp902812425	bacterial	d_Bacteria;p_Actinobacteriota;c_Rubrobacteria;o_Rubrobacterales;f_Rubrobacteraceae;g_SCSIO-52909;s_SCSIO-52909 sp902812425
s_CADCTB01 sp902805665	bacterial	d_Bacteria;p_Actinobacteriota;c_Acidimicrobiia;o_Acidimicrobiales;f_AC-14;g_CADCTB01;s_CADCTB01 sp902805665
s_SCSIO-52909 sp016781725	bacterial	d_Bacteria;p_Actinobacteriota;c_Rubrobacteria;o_Rubrobacterales;f_Rubrobacteraceae;g_SCSIO-52909;s_SCSIO-52909 sp016781725
s_JACCUC01 sp013812065	bacterial	d_Bacteria;p_Actinobacteriota;c_Thermoleophilia;o_Solirubrobacterales;f_Thermoleophilaceae;g_JACCUC01;s_JACCUC01 sp013812065
s_TH1177 sp014523515	archaea	d_Archaea;p_Thermoproteota;c_Nitrososphaeria;o_Nitrososphaerales;f_Nitrososphaeraceae;g_TH1177;s_TH1177 sp014523515
s_Halorussus amylolyticus	archaea	d_Archaea;p_Halobacteriota;c_Halobacteria;o_Halobacteriales;f_Haladaptataceae;g_Halorussus;s_Halorussus amylolyticus
s_Halorussus rarus	archaea	d_Archaea;p_Halobacteriota;c_Halobacteria;o_Halobacteriales;f_Haladaptataceae;g_Halorussus;s_Halorussus rarus
s_Nitrosocosmicus sp016782225	archaea	d_Archaea;p_Thermoproteota;c_Nitrososphaeria;o_Nitrososphaerales;f_Nitrososphaeraceae;g_Nitrosocosmicus;s_Nitrosocosmicus sp016782225
s_Halolamina sp000224475	archaea	d_Archaea;p_Halobacteriota;c_Halobacteria;o_Halobacteriales;f_Haloferacaceae;g_Halolamina;s_Halolamina sp000224475
s_Nitrosocosmicus sp016782315	archaea	d_Archaea;p_Thermoproteota;c_Nitrososphaeria;o_Nitrososphaerales;f_Nitrososphaeraceae;g_Nitrosocosmicus;s_Nitrosocosmicus sp016782315
s_Aciduliprofundum boonei	archaea	d_Archaea;p_Thermoplasmatota;c_Thermoplasmata;o_Aciduliprofundales;f_Aciduliprofundaceae;g_Aciduliprofundum;s_Aciduliprofundum boonei
s_Halobaculum sp013402875	archaea	d_Archaea;p_Halobacteriota;c_Halobacteria;o_Halobacteriales;f_Haloferacaceae;g_Halobaculum;s_Halobaculum sp013402875
s_Halorussus sp005239435	archaea	d_Archaea;p_Halobacteriota;c_Halobacteria;o_Halobacteriales;f_Haladaptataceae;g_Halorussus;s_Halorussus sp005239435
s_Halorussus sp008831545	archaea	d_Archaea;p_Halobacteriota;c_Halobacteria;o_Halobacteriales;f_Haladaptataceae;g_Halorussus;s_Halorussus sp008831545
s_Halorussus sp010747475	archaea	d_Archaea;p_Halobacteriota;c_Halobacteria;o_Halobacteriales;f_Haladaptataceae;g_Halorussus;s_Halorussus sp010747475
s_JAFAQB01 sp019246625	archaea	d_Archaea;p_Thermoproteota;c_Nitrososphaeria;o_Nitrososphaerales;f_Nitrososphaeraceae;g_JAFAQB01;s_JAFAQB01 sp019246625
s_Nitrososphaera sp013114715	archaea	d_Archaea;p_Thermoproteota;c_Nitrososphaeria;o_Nitrososphaerales;f_Nitrososphaeraceae;g_Nitrososphaera;s_Nitrososphaera sp013114715
s_Nitrososphaera viennensis	archaea	d_Archaea;p_Thermoproteota;c_Nitrososphaeria;o_Nitrososphaerales;f_Nitrososphaeraceae;g_Nitrososphaera;s_Nitrososphaera viennensis
s_UBA57 sp002494565	archaea	d_Archaea;p_Thermoproteota;c_Nitrososphaeria;o_Nitrososphaerales;f_UBA57;g_UBA57;s_UBA57 sp002494565
s_Nitrososphaera evergladensis	archaea	d_Archaea;p_Thermoproteota;c_Nitrososphaeria;o_Nitrososphaerales;f_Nitrososphaeraceae;g_Nitrososphaera;s_Nitrososphaera evergladensis
s_MGIIb-Q1 sp012964335	archaea	d_Archaea;p_Thermoplasmatota;c_Poseidoniia;o_Poseidoniales;f_Thalassarchaeaceae;g_MGIIb-Q1;s_MGIIb-Q1 sp012964335
s_Nitrososphaera sp013388945	archaea	d_Archaea;p_Thermoproteota;c_Nitrososphaeria;o_Nitrososphaerales;f_Nitrososphaeraceae;g_Nitrososphaera;s_Nitrososphaera sp013388945
s_Halegenticoccus sp004116405	archaea	d_Archaea;p_Halobacteriota;c_Halobacteria;o_Halobacteriales;f_Haloferacaceae;g_Halegenticoccus;s_Halegenticoccus sp004116405
s_Halegenticoccus soli	archaea	d_Archaea;p_Halobacteriota;c_Halobacteria;o_Halobacteriales;f_Haloferacaceae;g_Halegenticoccus;s_Halegenticoccus soli
s_Halobaculum sp013401515	archaea	d_Archaea;p_Halobacteriota;c_Halobacteria;o_Halobacteriales;f_Haloferacaceae;g_Halobaculum;s_Halobaculum sp013401515
s_Nitrososphaera sp002494895	archaea	d_Archaea;p_Thermoproteota;c_Nitrososphaeria;o_Nitrososphaerales;f_Nitrososphaeraceae;g_Nitrososphaera;s_Nitrososphaera sp002494895
s_Haladaptatus cibarius	archaea	d_Archaea;p_Halobacteriota;c_Halobacteria;o_Halobacteriales;f_Haladaptataceae;g_Haladaptatus;s_Haladaptatus cibarius
s_Nitrososphaera sp002501845	archaea	d_Archaea;p_Thermoproteota;c_Nitrososphaeria;o_Nitrososphaerales;f_Nitrososphaeraceae;g_Nitrososphaera;s_Nitrososphaera sp002501845
s_Haladaptatus sp001625445	archaea	d_Archaea;p_Halobacteriota;c_Halobacteria;o_Halobacteriales;f_Haladaptataceae;g_Haladaptatus;s_Haladaptatus sp001625445
s_Haladaptatus sp003298465	archaea	d_Archaea;p_Halobacteriota;c_Halobacteria;o_Halobacteriales;f_Haladaptataceae;g_Haladaptatus;s_Haladaptatus sp003298465
s_Haladaptatus paucihalophilus	archaea	d_Archaea;p_Halobacteriota;c_Halobacteria;o_Halobacteriales;f_Haladaptataceae;g_Haladaptatus;s_Haladaptatus paucihalophilus
s_Haladaptatus litoreus	archaea	d_Archaea;p_Halobacteriota;c_Halobacteria;o_Halobacteriales;f_Haladaptataceae;g_Haladaptatus;s_Haladaptatus litoreus
s_Nitrososphaera gargensis	archaea	d_Archaea;p_Thermoproteota;c_Nitrososphaeria;o_Nitrososphaerales;f_Nitrososphaeraceae;g_Nitrososphaera;s_Nitrososphaera gargensis
s_Methanosphaera stadtmanae	archaea	d_Archaea;p_Methanobacteriota;c_Methanobacteria;o_Methanobacteriales;f_Methanobacteriaceae;g_Methanosphaera;s_Methanosphaera stadtmanae
s_Pedinophyceae sp. YPF-701	eukaryon	d_Eukaryota;p_Chlorophyta;c_Pedinophyceae;o_Unclassified_c_Pedinophyceae;f_Unclassified_c_Pedinophyceae;g_Unclassified_c_Pedinophyceae;s_Pedinophyceae sp. YPF-701
s_Ascobolus immersus	eukaryon	d_Eukaryota;p_Ascomycota;c_Pezizomycetes;o_Pezizales;f_Ascobolaceae;g_Ascobolus;s_Ascobolus immersus
s_Pycnococcus provasolii	eukaryon	d_Eukaryota;p_Chlorophyta;c_Unclassified_p__Chlorophyta;o_Unclassified_p__Chlorophyta;f_Pycnococcaceae;g_Pycnococcus;s_Pycnococcus provasolii
s_Chlorella desiccata (nom. nud.)	eukaryon	d_Eukaryota;p_Chlorophyta;c_Trebouxiophyceae;o_Chlorellales;f_Chlorellaceae;g_Chlorella;s_Chlorella desiccata (nom. nud.)
s_Plasmodium ovale	eukaryon	d_Eukaryota;p_Apicomplexa;c_Aconoidasida;o_Haemosporida;f_Plasmodiidae;g_Plasmodium;s_Plasmodium ovale
s_Chloropicon primus	eukaryon	d_Eukaryota;p_Chlorophyta;c_Chloropicophyceae;o_Chloropicales;f_Chloropicaceae;g_Chloropicon;s_Chloropicon primus
s_Hyaloraphidium curvatum	eukaryon	d_Eukaryota;p_Chytridiomycota;c_Monoblepharidomycetes;o_Monoblepharidales;f_Unclassified_o__Monoblepharidales;g_Hyaloraphidium;s_Hyaloraphidium curvatum
s_Penicillium nalgiovense	eukaryon	d_Eukaryota;p_Ascomycota;c_Eurotiomycetes;o_Eurotiales;f_Aspergillaceae;g_Penicillium;s_Penicillium nalgiovense
s_Ostreobium quekettii	eukaryon	d_Eukaryota;p_Chlorophyta;c_Ulvophyceae;o_Bryopsidales;f_Ostreobiaceae;g_Ostreobium;s_Ostreobium quekettii
s_Trebouxia sp. A1-2	eukaryon	d_Eukaryota;p_Chlorophyta;c_Trebouxiophyceae;o_Trebouxiales;f_Trebouxiaceae;g_Trebouxia;s_Trebouxia sp. A1-2
s_Monosiga brevicollis	eukaryon	d_Eukaryota;p_Unclassified_d_Eukaryota;c_Choanoflagellata;o_Craspedida;f_Salpingoecidae;g_Monosiga;s_Monosiga brevicollis
s_Salpingoeca rosetta	eukaryon	d_Eukaryota;p_Unclassified_d_Eukaryota;c_Choanoflagellata;o_Craspedida;f_Salpingoecidae;g_Salpingoeca;s_Salpingoeca rosetta
s_Symbiodinium necroappetens	eukaryon	d_Eukaryota;p_Unclassified_d_Eukaryota;c_Dinophyceae;o_Suessiales;f_Symbiodiniaceae;g_Symbiodinium;s_Symbiodinium necroappetens
s_Glutinoglossum americanum	eukaryon	d_Eukaryota;p_Ascomycota;c_Geoglossomycetes;o_Geoglossales;f_Geoglossaceae;g_Glutinoglossum;s_Glutinoglossum americanum
s_Lingulodinium polyedra	eukaryon	d_Eukaryota;p_Unclassified_d_Eukaryota;c_Dinophyceae;o_Gonyaulacales;f_Lingulodiniaceae;g_Lingulodinium;s_Lingulodinium polyedra
s_Halteria grandinella	eukaryon	d_Eukaryota;p_Ciliophora;c_Spirotrichea;o_Sporadotrichida;f_Halteriidae;g_Halteria;s_Halteria grandinella
s_Aspergillus fumigatus	eukaryon	d_Eukaryota;p_Ascomycota;c_Eurotiomycetes;o_Eurotiales;f_Aspergillaceae;g_Aspergillus;s_Aspergillus fumigatus
s_Acanthamoeba castellanii	eukaryon	d_Eukaryota;p_Discosea;c_Unclassified_p__Discosea;o_Longamoebia;f_Acanthamoebidae;g_Acanthamoeba;s_Acanthamoeba castellanii
s_Pyrenophora tritici-repentis	eukaryon	d_Eukaryota;p_Ascomycota;c_Dothideomycetes;o_Pleosporales;f_Pleosporaceae;g_Pyrenophora;s_Pyrenophora tritici-repentis
s_Planoprotostelium fungivorum	eukaryon	d_Eukaryota;p_Evosea;c_Variosea;o_Cavosteliida;f_Cavosteliaceae;g_Planoprotostelium;s_Planoprotostelium fungivorum
s_Lipomyces starkeyi	eukaryon	d_Eukaryota;p_Ascomycota;c_Saccharomycetes;o_Saccharomycetales;f_Lipomycetaceae;g_Lipomyces;s_Lipomyces starkeyi
s_Plasmodium berghei	eukaryon	d_Eukaryota;p_Apicomplexa;c_Aconoidasida;o_Haemosporida;f_Plasmodiidae;g_Plasmodium;s_Plasmodium berghei
s_Symbiodinium microadriaticum	eukaryon	d_Eukaryota;p_Unclassified_d_Eukaryota;c_Dinophyceae;o_Suessiales;f_Symbiodiniaceae;g_Symbiodinium;s_Symbiodinium microadriaticum
s_Rhizoctonia solani	eukaryon	d_Eukaryota;p_Basidiomycota;c_Agaricomycetes;o_Cantharellales;f_Ceratobasidiaceae;g_Rhizoctonia;s_Rhizoctonia solani
s_Symbiodinium sp. KB8	eukaryon	d_Eukaryota;p_Unclassified_d_Eukaryota;c_Dinophyceae;o_Suessiales;f_Symbiodiniaceae;g_Symbiodinium;s_Symbiodinium sp. KB8
s_Rhizopus arrhizus	eukaryon	d_Eukaryota;p_Mucoromycota;c_Mucoromycetes;o_Mucorales;f_Rhizopodaceae;g_Rhizopus;s_Rhizopus arrhizus
s_Aspergillus terreus	eukaryon	d_Eukaryota;p_Ascomycota;c_Eurotiomycetes;o_Eurotiales;f_Aspergillaceae;g_Aspergillus;s_Aspergillus terreus
s_Aspergillus fumigatiaffinis	eukaryon	d_Eukaryota;p_Ascomycota;c_Eurotiomycetes;o_Eurotiales;f_Aspergillaceae;g_Aspergillus;s_Aspergillus fumigatiaffinis
s_Cladocopium goreaui	eukaryon	d_Eukaryota;p_Unclassified_d_Eukaryota;c_Dinophyceae;o_Suessiales;f_Symbiodiniaceae;g_Cladocopium;s_Cladocopium goreaui
s_Stylonychia lemnae	eukaryon	d_Eukaryota;p_Ciliophora;c_Spirotrichea;o_Sporadotrichida;f_Oxytrichidae;g_Stylonychia;s_Stylonychia lemnae
s_Paslahepevirus balayani	virus	d_Viruses;p_Kitrinoviricota;c_Alsuviricetes;o_Hepelivirales;f_Hepeviridae;g_Paslahepevirus;s_Paslahepevirus balayani
s_Namao virus	virus	d_Viruses;p_Nucleocytoviricota;c_Megaviricetes;o_Imitervirales;f_Mimiviridae;g_Unclassified_f__Mimiviridae;s_Namao virus
s_Blattodean nairo-related virus OKIAV321	virus	d_Viruses;p_Negarnaviricota;c_Ellioviricetes;o_Bunyavirales;f_Nairoviridae;g_Unclassified_f_Nairoviridae;s_Blattodean nairo-related virus OKIAV321
s_Chaetfec virus UA24_144	virus	d_Viruses;p_Uroviricota;c_Caudoviricetes;o_Unclassified_c_Caudoviricetes;f_Siphoviridae;g_Unclassified_f_Siphoviridae;s_Chaetfec virus UA24_144
s_Mitovirus sp.	virus	d_Viruses;p_Lenarviricota;c_Howeltoviricetes;o_Cryppavirales;f_Mitoviridae;g_Mitovirus;s_Mitovirus sp.
s_Bodo saltans virus	virus	d_Viruses;p_Nucleocytoviricota;c_Megaviricetes;o_Imitervirales;f_Mimiviridae;g_Klosneuvirus;s_Bodo saltans virus
s_Pandoravirus dulcis	virus	d_Viruses;p_Unclassified_d_Viruses;c_Unclassified_d_Viruses;o_Unclassified_d_Viruses;f_Unclassified_d_Viruses;g_Pandoravirus;s_Pandoravirus dulcis
s_Hyperionvirus sp.	virus	d_Viruses;p_Nucleocytoviricota;c_Megaviricetes;o_Imitervirales;f_Mimiviridae;g_Unclassified_f_Mimiviridae;s_Hyperionvirus sp.
s_Fadolivirus 1	virus	d_Viruses;p_Unclassified_d_Viruses;c_Unclassified_d_Viruses;o_Unclassified_d_Viruses;f_Unclassified_d_Viruses;g_Unclassified_d_Viruses;s_Fadolivirus 1
s_Cedratvirus kamchatka	virus	d_Viruses;p_Unclassified_d_Viruses;c_Unclassified_d_Viruses;o_Unclassified_d_Viruses;f_Pithoviridae;g_Unclassified_f_Pithoviridae;s_Cedratvirus kamchatka
s_Mouse mammary tumor virus	virus	d_Viruses;p_Artverviricota;c_Revtraviricetes;o_Ortervirales;f_Retroviridae;g_Betaretrovirus;s_Mouse mammary tumor virus
s_Molluscum contagiosum virus	virus	d_Viruses;p_Nucleocytoviricota;c_Pokkesviricetes;o_Chitovirales;f_Poxviridae;g_Molluscipoxvirus;s_Molluscum contagiosum virus
s_Abelson murine leukemia virus	virus	d_Viruses;p_Artverviricota;c_Revtraviricetes;o_Ortervirales;f_Retroviridae;g_Gammaretrovirus;s_Abelson murine leukemia virus
s_Carp edema virus	virus	d_Viruses;p_Nucleocytoviricota;c_Pokkesviricetes;o_Chitovirales;f_Poxviridae;g_Unclassified_f_Poxviridae;s_Carp edema virus
s_AKT8 retrovirus	virus	d_Viruses;p_Artverviricota;c_Revtraviricetes;o_Ortervirales;f_Retroviridae;g_Unclassified_f_Retroviridae;s_AKT8 retrovirus
s_Murine leukemia virus	virus	d_Viruses;p_Artverviricota;c_Revtraviricetes;o_Ortervirales;f_Retroviridae;g_Gammaretrovirus;s_Murine leukemia virus
s_Feline leukemia virus	virus	d_Viruses;p_Artverviricota;c_Revtraviricetes;o_Ortervirales;f_Retroviridae;g_Gammaretrovirus;s_Feline leukemia virus
s_Avian leukosis virus	virus	d_Viruses;p_Artverviricota;c_Revtraviricetes;o_Ortervirales;f_Retroviridae;g_Alpharetrovirus;s_Avian leukosis virus
s_Satyrvirus sp.	virus	d_Viruses;p_Nucleocytoviricota;c_Megaviricetes;o_Imitervirales;f_Mimiviridae;g_Unclassified_f_Mimiviridae;s_Satyrvirus sp.
s_Cotonvirus japonicus	virus	d_Viruses;p_Nucleocytoviricota;c_Megaviricetes;o_Imitervirales;f_Mimiviridae;g_Unclassified_f_Mimiviridae;s_Cotonvirus japonicus
s_Virus Rctr71	virus	d_Viruses;p_Unclassified_d_Viruses;c_Unclassified_d_Viruses;o_Unclassified_d_Viruses;f_Unclassified_d_Viruses;g_Unclassified_d_Viruses;s_Virus Rctr71
s_Tupanvirus soda lake	virus	d_Viruses;p_Nucleocytoviricota;c_Megaviricetes;o_Imitervirales;f_Mimiviridae;g_Tupanvirus;s_Tupanvirus soda lake
s_Moumouvirus	virus	d_Viruses;p_Nucleocytoviricota;c_Megaviricetes;o_Imitervirales;f_Mimiviridae;g_Unclassified_f_Mimiviridae;s_Moumouvirus
s_Tupanvirus deep ocean	virus	d_Viruses;p_Nucleocytoviricota;c_Megaviricetes;o_Imitervirales;f_Mimiviridae;g_Tupanvirus;s_Tupanvirus deep ocean
s_Pestivirus A	virus	d_Viruses;p_Kitrinoviricota;c_Flasuviricetes;o_Amarillovirales;f_Flaviviridae;g_Pestivirus;s_Pestivirus A
s_Great lobelia partitivirus	virus	d_Viruses;p_Pisuviricota;c_Duplopiviricetes;o_Durnavirales;f_Partitiviridae;g_Unclassified_f_Partitiviridae;s_Great lobelia partitivirus
s_Rotavirus C	virus	d_Viruses;p_Duplornaviricota;c_Resentoviricetes;o_Reovirales;f_Sedoreoviridae;g_Rotavirus;s_Rotavirus C
s_Acanthamoeba polyphaga mimivirus	virus	d_Viruses;p_Nucleocytoviricota;c_Megaviricetes;o_Imitervirales;f_Mimiviridae;g_Mimivirus;s_Acanthamoeba polyphaga mimivirus
s_uncultured virus	virus	d_Viruses;p_Unclassified_d_Viruses;c_Unclassified_d_Viruses;o_Unclassified_d_Viruses;f_Unclassified_d_Viruses;g_Unclassified_d_Viruses;s_uncultured virus
s_Mammalian orthorubulavirus 5	virus	d_Viruses;p_Negarnaviricota;c_Monjiviricetes;o_Mononegavirales;f_Paramyxoviridae;g_Orthorubulavirus;s_Mammalian orthorubulavirus 5
