# Supplementary material for: Metagenomic evidence for antibiotic-associated actinomycetes in the Karamay Gobi region
Source: Front Microbiol. 2024 Mar 5;15:1330880. doi: 10.3389/fmicb.2024.1330880 (PMC10949947; doi:10.3389/fmicb.2024.1330880)
Supplement: Supplementary file 3 [file Table_3.XLS]

## Sheet: Sheet1
species	taxonomy
s_SCSIO-52915 sp019247245	d_Bacteria;p_Actinobacteriota;c_Rubrobacteria;o_Rubrobacterales;f_Rubrobacteraceae;g_SCSIO-52915;s_SCSIO-52915 sp019247245
s_Cellulomonas aerilata	d_Bacteria;p_Actinobacteriota;c_Actinomycetia;o_Actinomycetales;f_Cellulomonadaceae;g_Cellulomonas;s_Cellulomonas aerilata
s_LC5-1 sp016781085	d_Bacteria;p_Actinobacteriota;c_Thermoleophilia;o_Solirubrobacterales;f_Solirubrobacteraceae;g_LC5-1;s_LC5-1 sp016781085
s_SCTD01 sp902805805	d_Bacteria;p_Actinobacteriota;c_Actinomycetia;o_Mycobacteriales;f_SCTD01;g_SCTD01;s_SCTD01 sp902805805
s_RSA11 sp002919115	d_Bacteria;p_Actinobacteriota;c_Thermoleophilia;o_Solirubrobacterales;f_70-9;g_RSA11;s_RSA11 sp002919115
s_JAAYBF01 sp013811765	d_Bacteria;p_Actinobacteriota;c_Thermoleophilia;o_Solirubrobacterales;f_Thermoleophilaceae;g_JAAYBF01;s_JAAYBF01 sp013811765
s_SCSIO-52915 sp902806055	d_Bacteria;p_Actinobacteriota;c_Rubrobacteria;o_Rubrobacterales;f_Rubrobacteraceae;g_SCSIO-52915;s_SCSIO-52915 sp902806055
s_JACVSB01 sp014534155	d_Bacteria;p_Actinobacteriota;c_Thermoleophilia;o_Gaiellales;f_Gaiellaceae;g_JACVSB01;s_JACVSB01 sp014534155
s_SIRX01 sp004563715	d_Bacteria;p_Actinobacteriota;c_Rubrobacteria;o_Rubrobacterales;f_Rubrobacteraceae;g_SIRX01;s_SIRX01 sp004563715
s_JACCUC01 sp902806245	d_Bacteria;p_Actinobacteriota;c_Thermoleophilia;o_Solirubrobacterales;f_Thermoleophilaceae;g_JACCUC01;s_JACCUC01 sp902806245
s_JACVRR01 sp014534345	d_Bacteria;p_Actinobacteriota;c_Thermoleophilia;o_Gaiellales;f_Gaiellaceae;g_JACVRR01;s_JACVRR01 sp014534345
s_UBA4001 sp002384855	d_Bacteria;p_Actinobacteriota;c_Actinomycetia;o_Propionibacteriales;f_Nocardioidaceae;g_UBA4001;s_UBA4001 sp002384855
s_MB1-2 sp016781115	d_Bacteria;p_Actinobacteriota;c_UBA4738;o_CADDZG01;f_WHSQ01;g_MB1-2;s_MB1-2 sp016781115
s_JACVRW01 sp014534235	d_Bacteria;p_Actinobacteriota;c_Thermoleophilia;o_Solirubrobacterales;f_Thermoleophilaceae;g_JACVRW01;s_JACVRW01 sp014534235
s_JACCYG01 sp013696595	d_Bacteria;p_Actinobacteriota;c_Thermoleophilia;o_Gaiellales;f_Gaiellaceae;g_JACCYG01;s_JACCYG01 sp013696595
s_Marmoricola A sp902805865	d_Bacteria;p_Actinobacteriota;c_Actinomycetia;o_Propionibacteriales;f_Nocardioidaceae;g_Marmoricola A;s_Marmoricola A sp902805865
s_YB1-3 sp016781225	d_Bacteria;p_Actinobacteriota;c_Acidimicrobiia;o_Acidimicrobiales;f_GCA-2861595;g_YB1-3;s_YB1-3 sp016781225
s_CADCVT01 sp902806215	d_Bacteria;p_Actinobacteriota;c_Thermoleophilia;o_Solirubrobacterales;f_Solirubrobacteraceae;g_CADCVT01;s_CADCVT01 sp902806215
s_JADDRA01 sp016781105	d_Bacteria;p_Actinobacteriota;c_Acidimicrobiia;o_Acidimicrobiales;f_CADCSY01;g_JADDRA01;s_JADDRA01 sp016781105
s_Nocardioides euryhalodurans	d_Bacteria;p_Actinobacteriota;c_Actinomycetia;o_Propionibacteriales;f_Nocardioidaceae;g_Nocardioides;s_Nocardioides euryhalodurans
s_SCSIO-52909 sp902812425	d_Bacteria;p_Actinobacteriota;c_Rubrobacteria;o_Rubrobacterales;f_Rubrobacteraceae;g_SCSIO-52909;s_SCSIO-52909 sp902812425
s_SCSIO-52915 sp902806065	d_Bacteria;p_Actinobacteriota;c_Rubrobacteria;o_Rubrobacterales;f_Rubrobacteraceae;g_SCSIO-52915;s_SCSIO-52915 sp902806065
s_JACVRW01 sp013813135	d_Bacteria;p_Actinobacteriota;c_Thermoleophilia;o_Solirubrobacterales;f_Thermoleophilaceae;g_JACVRW01;s_JACVRW01 sp013813135
s_JACVSB01 sp013697275	d_Bacteria;p_Actinobacteriota;c_Thermoleophilia;o_Gaiellales;f_Gaiellaceae;g_JACVSB01;s_JACVSB01 sp013697275
s_WHTG01 sp009377835	d_Bacteria;p_Actinobacteriota;c_Actinomycetia;o_Euzebyales;f_Egibacteraceae;g_WHTG01;s_WHTG01 sp009377835
s_LC5-5 sp016781135	d_Bacteria;p_Actinobacteriota;c_Acidimicrobiia;o_Acidimicrobiales;f_CADCSY01;g_LC5-5;s_LC5-5 sp016781135
s_SCSIO-52909 sp016781725	d_Bacteria;p_Actinobacteriota;c_Rubrobacteria;o_Rubrobacterales;f_Rubrobacteraceae;g_SCSIO-52909;s_SCSIO-52909 sp016781725
s_WHSW01 sp009379895	d_Bacteria;p_Actinobacteriota;c_Thermoleophilia;o_Solirubrobacterales;f_70-9;g_WHSW01;s_WHSW01 sp009379895
s_JACCUC01 sp013812065	d_Bacteria;p_Actinobacteriota;c_Thermoleophilia;o_Solirubrobacterales;f_Thermoleophilaceae;g_JACCUC01;s_JACCUC01 sp013812065
s_CADCTB01 sp902805665	d_Bacteria;p_Actinobacteriota;c_Acidimicrobiia;o_Acidimicrobiales;f_AC-14;g_CADCTB01;s_CADCTB01 sp902805665
