# Supplementary material for: Metagenomic evidence for antibiotic-associated actinomycetes in the Karamay Gobi region
Source: Front Microbiol. 2024 Mar 5;15:1330880. doi: 10.3389/fmicb.2024.1330880 (PMC10949947; doi:10.3389/fmicb.2024.1330880)
Supplement: Supplementary file 4 [file Table_4.XLS]

## Sheet: function_summary
Term	gbwb	gbnb	gbzx
orthosomycin antibiotic	3.16e-05	0.0001222	3.68e-05
nitrofuran antibiotic	7.76e-05	0.0001232	7.42e-05
zoliflodacin-like antibiotic	0.0001508	0.0001972	0.0002772
bicyclomycin-like antibiotic	0.001443	0.00052	0.0003546
antibacterial free fatty acids	0.0011456	0.0011542	0.0007558
nucleoside antibiotic	0.0019148	0.0019352	0.0021958
streptogramin B antibiotic	0.0022526	0.0023972	0.0027564
sulfone antibiotic	0.0025952	0.0028922	0.0027258
thioamide antibiotic	0.0053528	0.0026098	0.002041
nitroimidazole antibiotic	0.0037176	0.0039656	0.0042362
streptogramin A antibiotic	0.0045154	0.0048776	0.0053862
salicylic acid antibiotic	0.0055008	0.0052344	0.0049946
pyrazine antibiotic	0.0054322	0.0058824	0.0061128
nybomycin-like antibiotic	0.0064028	0.0057224	0.0056194
pleuromutilin antibiotic	0.0083724	0.0067612	0.006564
sulfonamide antibiotic	0.007568	0.007844	0.0069928
streptogramin antibiotic	0.0073108	0.0081534	0.0086052
polyamine antibiotic	0.0079872	0.008653	0.0085716
elfamycin antibiotic	0.0085154	0.0087586	0.0090368
glycylcycline	0.0088442	0.0090996	0.0083756
penem	0.011104	0.0110628	0.009942
fusidane antibiotic	0.0107496	0.0113546	0.0117686
lincosamide antibiotic	0.0132262	0.0119276	0.0127216
mupirocin-like antibiotic	0.0119972	0.012722	0.0136452
diaminopyrimidine antibiotic	0.0156546	0.0127552	0.012842
phosphonic acid antibiotic	0.0132716	0.0149638	0.0162664
oxazolidinone antibiotic	0.016344	0.0157308	0.0140008
aminocoumarin antibiotic	0.0258164	0.024159	0.025433
rifamycin antibiotic	0.0272216	0.0251488	0.0267286
monobactam	0.0289844	0.0333158	0.030404
glycopeptide antibiotic	0.031018	0.0306518	0.033056
phenicol antibiotic	0.035319	0.0331404	0.0316488
isoniazid-like antibiotic	0.033332	0.0336712	0.0351424
cephamycin	0.0357458	0.0398216	0.0374544
carbapenem	0.0387108	0.0442924	0.0416044
aminoglycoside antibiotic	0.0458364	0.0428594	0.0463272
cephalosporin	0.0482678	0.0524126	0.049522
fluoroquinolone antibiotic	0.059479	0.0549806	0.054835
disinfecting agents and antiseptics	0.068741	0.0660006	0.0647984
penam	0.0723938	0.0746132	0.0741274
tetracycline antibiotic	0.0858454	0.0787204	0.0753216
macrolide antibiotic	0.0860564	0.0851176	0.0860126
peptide antibiotic	0.095753	0.103674	0.110686
